# Supplementary material for: Sensory impairment and all-cause mortality among the elderly adults in China: a population-based cohort study
Source: publisher site journal article supplement (doi:10.18632/aging.202198), 2020-11-26
Supplement: Supplementary file [file aging-v12i23-202198-supplementary-material-SD1.pdf]

## SUPPLEMENTARY FIGURE

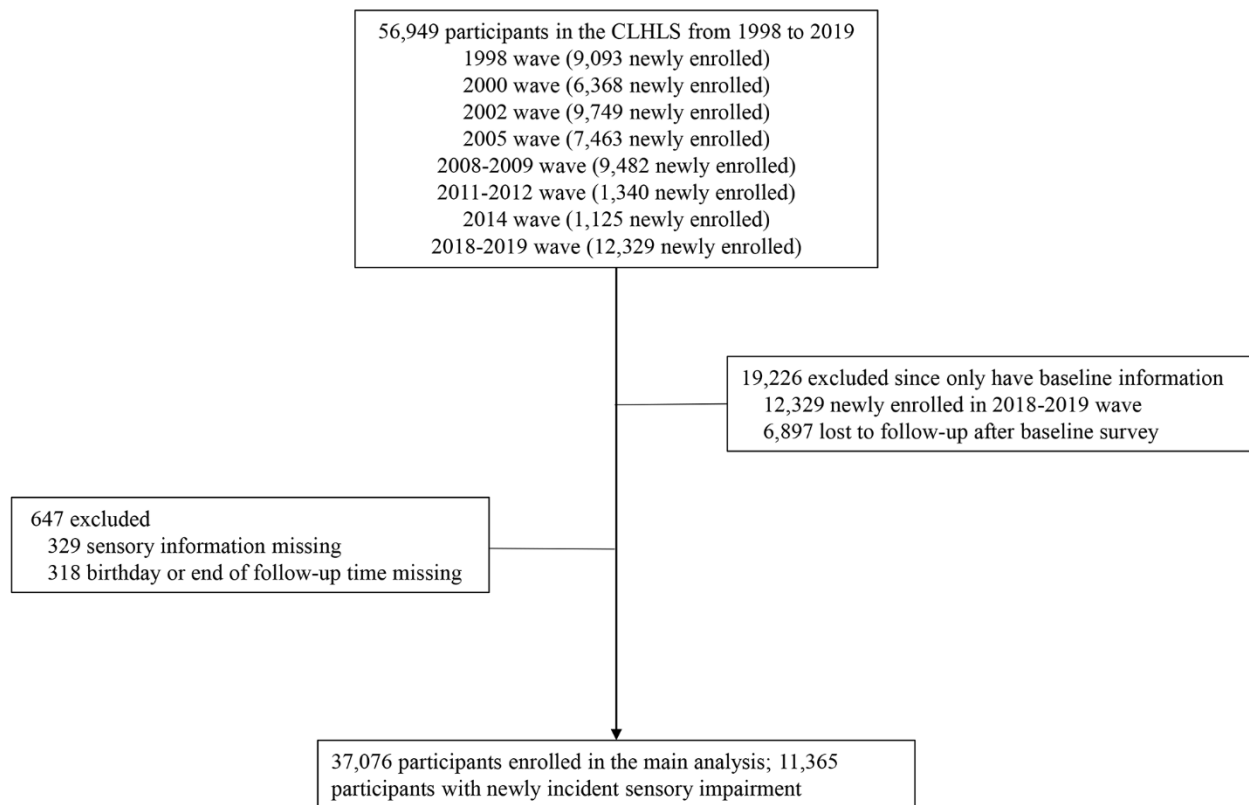

Supplementary Figure 1. Flow chart of participant selection, a cohort study of the elderly adults in China, 1998-2019.
