# Supplementary material for: Sensory impairment and all-cause mortality among the elderly adults in China: a population-based cohort study
Source: publisher site journal article supplement (doi:10.18632/aging.202198), 2020-11-26
Supplement: Supplementary file [file aging-v12i23-202198-supplementary-material-SD2.pdf]

## SUPPLEMENTARY TABLE

**Supplementary Table 1. Risk of all-cause mortality among participants with hearing aid, a cohort study in China, 1998-2019.**

| Population       | Groups                        | Cases/Person-years | HR (95% CIs)     |                  |                  |
|------------------|-------------------------------|--------------------|------------------|------------------|------------------|
|                  |                               |                    | Model 1          | Model 2          | Model 3          |
| Whole Population | No sensory impairment         | 16072/132449       | 1.00 (reference) | 1.00 (reference) | 1.00 (reference) |
|                  | Participants with hearing aid | 8343/29047         | 1.26 (1.23-1.30) | 1.23 (1.19-1.26) | 1.06 (1.03-1.09) |

Abbreviations: CIs: confident intervals; HR: hazard ratio.

Model 1: adjusted for age and sex; Model 2: adjusted for age, sex, enrollment year, province, residence, ethnic, marriage status, occupation, access to medical service, smoking status, drinking status, and exercise status; Model 3: model 2 + further adjusted for ADL score, physical performance score, MMSE score, food diversity score, social activity score, and chronic disease score.

**Supplementary Table 2. Definition of scores that analyzed in this article.**

| <b>Score</b>                               | <b>Measured for</b>                | <b>Items</b>                                                                                                                                                                                                                                                                  | <b>Assignment</b>                                                                                                                                                                                                               | <b>Range</b>                                                                   |
|--------------------------------------------|------------------------------------|-------------------------------------------------------------------------------------------------------------------------------------------------------------------------------------------------------------------------------------------------------------------------------|---------------------------------------------------------------------------------------------------------------------------------------------------------------------------------------------------------------------------------|--------------------------------------------------------------------------------|
| Activities of daily living (ADL) score     | Disability of ADL                  | Six items regarding ADL: eating, dressing, transferring, using the toilet, bathing and continence                                                                                                                                                                             | If there was no need assistance for the activity, one score was given, otherwise zero was given.                                                                                                                                | Ranging from 0 to 6; Higher score indicating better functional capacity        |
| Mini-Mental State Examination (MMSE) score | Cognitive impairment               | Twenty-four items regarding orientation, registration, attention, calculation, recall and language                                                                                                                                                                            | For 23 items, one score was given if the participants rightly answered the question; for the last item, zero to 7 score was given based on the number of the name of eatable foods that participants mentioned within 1 minute. | Ranging from 0 to 30; Higher score indicating better cognitive function        |
| Food diversity score                       | Diversity of food intake           | Consumption frequency of eight food groups: fruits, vegetables, meat, fish, eggs, legumes and its products, garlic, tea                                                                                                                                                       | If the consumption frequency of one food group was at least once a week, one score was given, otherwise zero was given.                                                                                                         | Ranging from 0 to 8; Higher score indicating higher food diversity             |
| Social activity score                      | Social activity engagement         | Taking frequency of eight social activities: doing outdoor activities, raise pets, reading books, watching TV or listening to the radio, doing housework or taking care of grandchildren, playing cards or mah-jong, taking part in social activities or religious activities | If the taking frequency of one activity was at least once a week, one score was given, otherwise zero was given.                                                                                                                | Ranging from 0 to 8; Higher score indicating higher social activity engagement |
| Physical performance score                 | Disability of physical performance | Five objective physical performance tests: standing from a chair, picking up a book from the floor, being able to turning around 360 degree, being able to touch neck by hand and being able to touch lower back by hand                                                      | If the participant can finish one test without help or by using two hands then one score was given; if they can finish it with help or only using one hand then "0.5" was given; otherwise zero was given.                      | Ranging from 0 to 5; Higher score indicating better physical capacity          |
| Chronic disease score                      | Chronic disease status             | Status of eight chronic disease: hypertension, diabetes, heart disease, stroke or cerebrovascular disease, lung disease (e.g., bronchitis, emphysema, asthma or pneumonia), cancer, gastrointestinal ulcer and Parkinson's disease                                            | If the participant self-reported or was diagnosed with the specific disease then one score was given, otherwise zero was given.                                                                                                 | Ranging from 0 to 8; Higher score indicating higher chronic disease status     |
